# Supplementary material for: C-C Motif Chemokine Ligand-17 as a Novel Biomarker and Regulator of Epithelial Mesenchymal Transition in Renal Fibrogenesis
Source: MDPI journal article supplement (doi:10.3390/cells10123345), 2021-11-29
Supplement: s1 [file s1]

# C-C Motif Chemokine Ligand-17 as a Novel Biomarker and Regulator of Epithelial Mesenchymal Transition in Renal Fibrogenesis

Yi-Hsien Hsieh, Wen-Chien Wang, Tung-Wei Hung, Chu-Che Lee and Jen-Pi Tsai

## Supplementary Figure 1

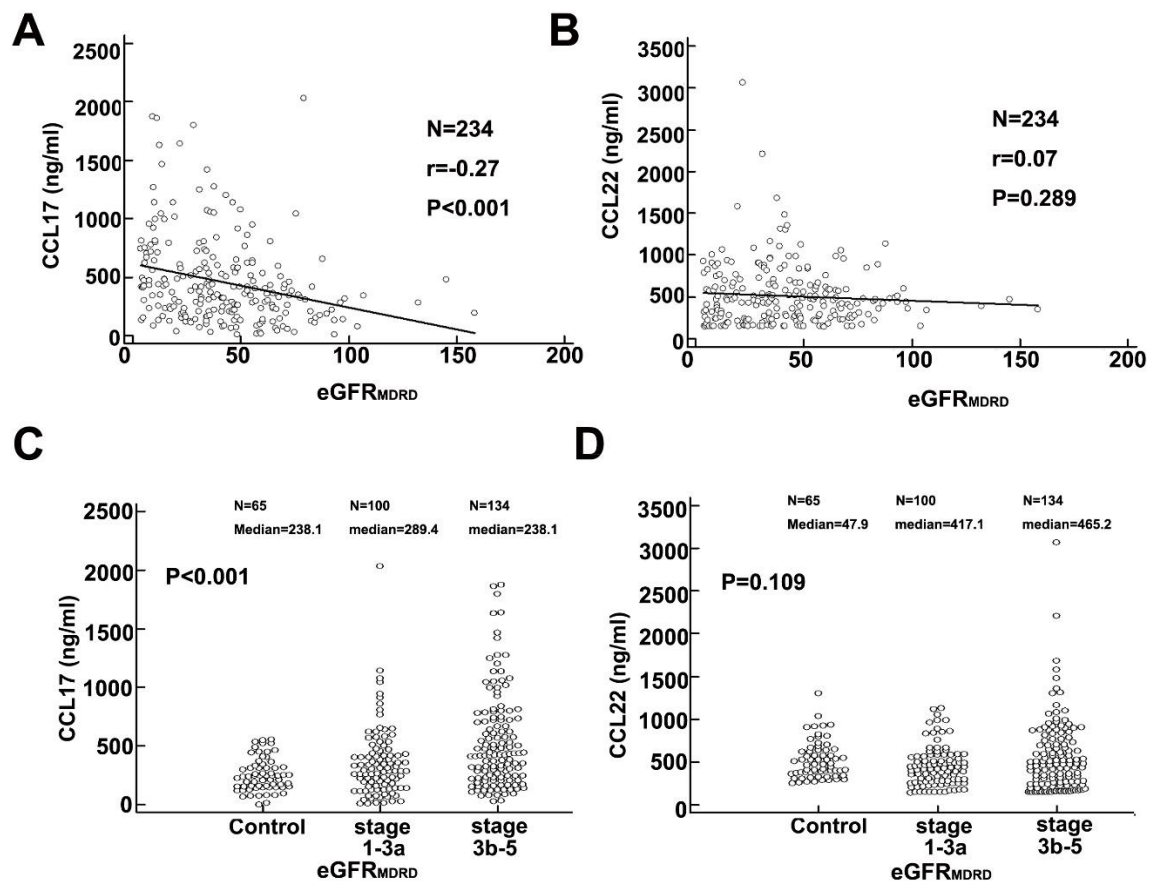

**Supplementary Figure S1.** Upregulation of CCL17 expression with loss of renal function. Correlation analysis of CCL17 (A) or CCL22 (B) with eGFR<sub>MDRD</sub> for all CKD patients. Comparison of mean serum values of CCL17 (C) and CCL22 (D) between the normal population (Control), CKD stage 1–3a and stage 3b–5 with eGFR<sub>MDRD</sub> for all CKD patients.

## Supplementary Figure 2

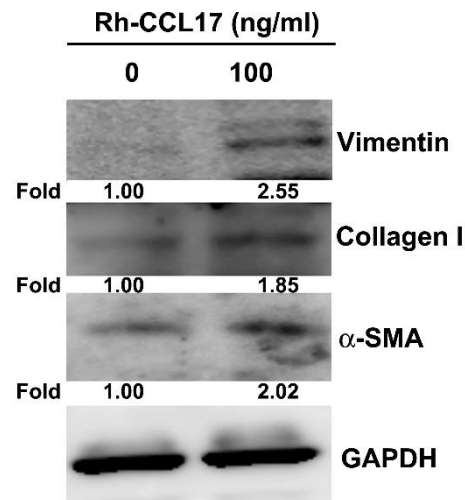

**Supplementary Figure S2.** Rh-CCL17 induce the fibrotic- and EMT-related proteins in human HK2 cells. Rh-CCL17 treated with or without Rh-CCL17 (100 ng/mL) for 48 h and extracted total HK2 cell lysates to determine the protein expression of CCL17, collagen I,  $\alpha$ -SMA, and vimentin. GAPDH was used to normalize protein loading.

## Supplementary Table 1

**Table S1.** Baseline characteristic of eGFR<sub>MDRD</sub> for normal population and CKD patients.

|                               |                 | Early CKD       |                 |                 | Advanced CKD    |                 |                 |
|-------------------------------|-----------------|-----------------|-----------------|-----------------|-----------------|-----------------|-----------------|
| Number                        | 65              | 11              | 45              | 44              | 53              | 35              | 46              |
| Age (year)                    | 50.17±10.70     | 60.91±12.36     | 64.02±12.14     | 71.68±10.77     | 72.60±10.77     | 74.03±9.17      | 71.72±13.73     |
| Female/Male                   | 35/30           | 4/7             | 14/31           | 13/31           | 19/34           | 18/17           | 26/20           |
| BUN (mg/dl)                   | 9.09±2.73       | 11.45±3.93      | 15.51±5.00      | 21.11±7.26      | 26.11±7.40      | 41.37±18.30     | 69.43±22.83     |
| Cre (mg/dl)                   | 0.75±0.13       | 0.72±0.11       | 1.04±0.16       | 1.35±0.19       | 1.80±0.29       | 2.65±0.56       | 6.60±2.65       |
| eGFR <sub>MDRD</sub> (ml/min) | 102.69±10.46    | 110.77±23.33    | 71.32±8.28      | 51.47±4.47      | 36.39±4.05      | 22.64±4.39      | 8.88±3.42       |
| CCL17 (ng/ml)                 | 250.01±138.08   | 222.15±133.50   | 344.25±327.77   | 397.04±345.65   | 475.48±348.55   | 444.67±408.68   | 671.90±431.10   |
|                               | 238.10          | 218             | 300.30          | 293.30          | 368.30          | 285.27          | 590.00          |
|                               | (149.56-321.72) | (128.55-304.73) | (148.15-405.45) | (175.83-578.12) | (206.34-631.46) | (171.48-535.12) | (410.90-809.67) |
| CCL22 (ng/ml)                 | 519.03±217.67   | 410.06±116.44   | 4565.65±247.88  | 437.25±243.61   | 633.40±440.78   | 553.24±544.87   | 463.60±282.65   |

Abbreviation: BUN, blood urea nitrogen; Cre, creatinine; eGFR, estimated glomerular filtration rate; early CKD indicated CKD stage 1 to 3a; advanced CKD indicated CKD stage 3b to 5; MDRD, Modification of Diet in Renal Disease (MDRD)
